# Supplementary material for: Impact of HLA Mismatching on Early Subclinical Inflammation in Low-Immunological-Risk Kidney Transplant Recipients
Source: MDPI journal article supplement (doi:10.3390/jcm10091934), 2021-04-29
Supplement: s1 [file s1]

**Table 1.** Inflammatory and chronicity scores and clinical data in the NI and SCI groups at the baseline three-month protocol biopsy.

|                    | NI<br>( <i>n</i> = 51) | SCI<br>( <i>n</i> = 54) | <i>p</i> value |
|--------------------|------------------------|-------------------------|----------------|
| <b>g (1–3)</b>     | 2.2                    | 9.3                     | 0.137          |
| <b>ptc (1–3)</b>   | 0                      | 19.2                    | 0.001 *        |
| <b>t (1–3)</b>     | 0                      | 59.3                    | 0.000 *        |
| <b>i (1–3)</b>     | 0                      | 100                     | 0.000 *        |
| <b>v (1–3)</b>     | 0                      | 2.0                     | 0.352          |
| <b>ci (1–3)</b>    | 28.9                   | 58.0                    | 0.004 *        |
| <b>ct (1–3)</b>    | 25.0                   | 51.0                    | 0.010*         |
| <b>cg (1–3)</b>    | 0                      | 0                       | -              |
| <b>cv (1–3)</b>    | 27.3                   | 46.9                    | 0.051          |
| <b>ah (1–3)</b>    | 22.9                   | 33.3                    | 0.244          |
| <b>ct+ci</b>       | 27.3                   | 60.4                    | 0.001 *        |
| <b>IFTA ≥2</b>     | 25                     | 45.8                    | 0.037 *        |
| <b>ct+ci+cg+cv</b> | 42.9                   | 75.0                    | 0.002 *        |

Abbreviations: ah, arteriolar hyaline thickening; ci, chronic interstitial fibrosis; cg, transplant glomerulopathy; ct, chronic tubular; cv, fibrous intimal thickening; g, glomerulitis; i, interstitial infiltration; IFTA, proportion of patients with sum of interstitial fibrosis and tubular atrophy; NI, no inflammation; ptc, peritubular capillaritis; SCI, subclinical inflammation; t, tubulitis; v, arteritis. Data are shown as percentage. \*statistically significant p-values.
